# Supplementary material
Source: PubMed Central journal article supplement (PMC8339672)
Supplement: EMBR-22-e50922-s005.pdf [file EMBR-22-e50922-s005.pdf]

## Expanded View Figures

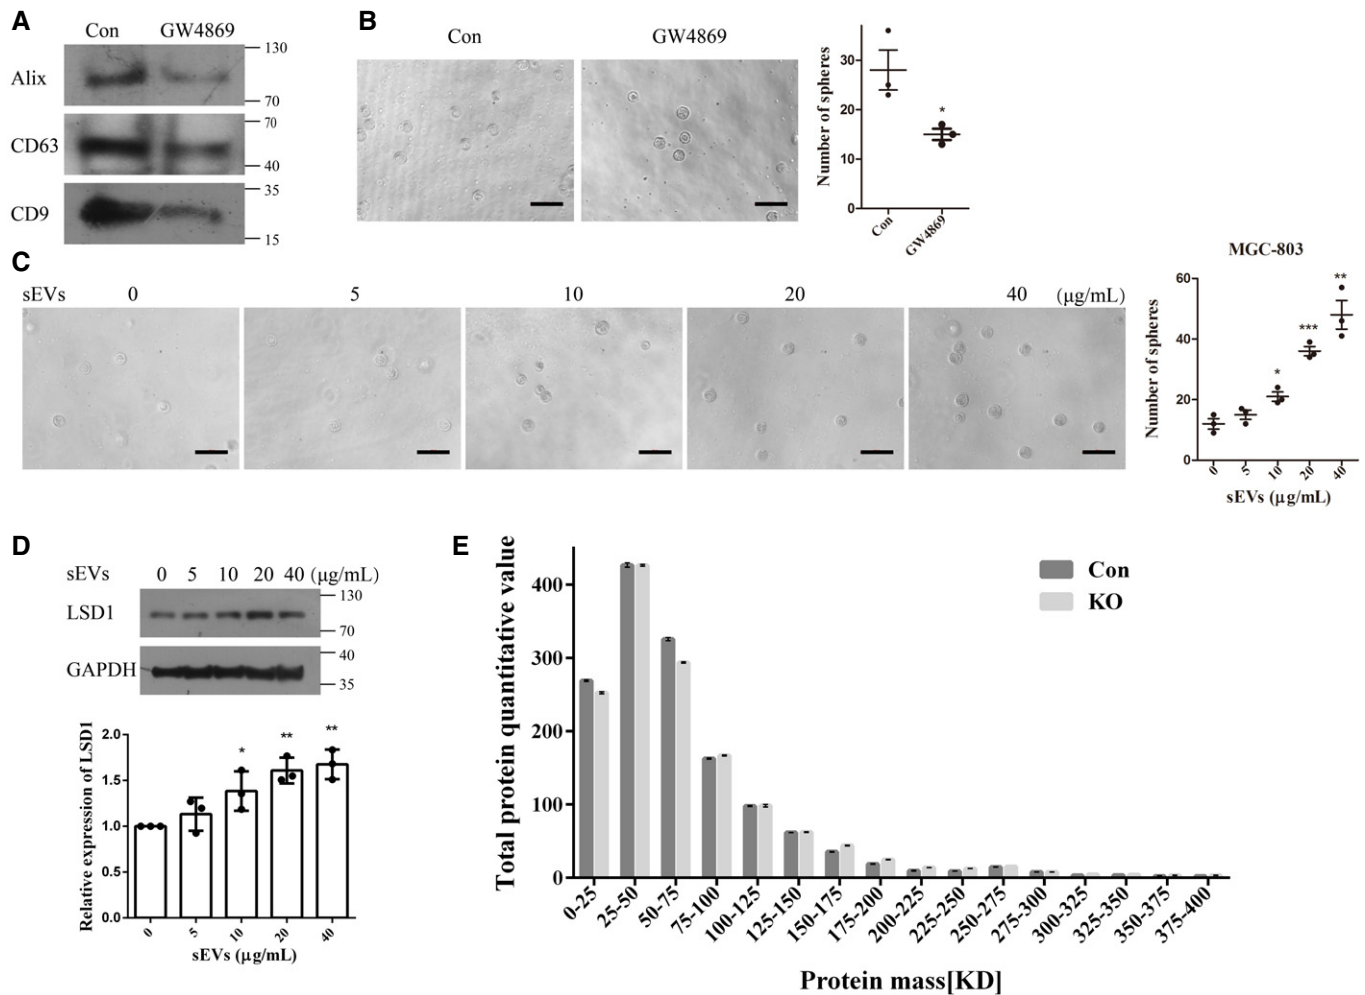

**Figure EV1. Small extracellular vesicles (sEVs) promote sphere formation in recipient cells.**

- A sEV marker proteins were detected using Western blotting to determine the amount of sEVs secreted by equal numbers of cells (Con indicates sEVs isolated from MGC-803 cells; GW4869 indicates sEVs isolated from GW4869-treated MGC-803 cells).
- B Sphere formation assay results of MGC-803 cells treated with sEVs (from equal number of cells) from control or GW4869-treated cell culture medium. Scale bar = 100  $\mu$ m ( $n = 3$  biological replicates; mean  $\pm$  standard error of mean (SEM); \* $P = 0.0365$ ; two-tailed unpaired Student's  $t$ -test).
- C Sphere formation assay results of MGC-803 cells treated with different doses of sEVs as indicated. Scale bar = 100  $\mu$ m ( $n = 3$  biological replicates; mean  $\pm$  SEM; \* $P = 0.0176$ , \*\*\* $P = 0.0005$ , and \*\* $P = 0.0020$ ; two-tailed unpaired Student's  $t$ -test).
- D Expression level of LSD1 in MGC-803 cells treated with different doses of sEVs as indicated ( $n = 3$  biological replicates; mean  $\pm$  SEM; \* $P(10 \mu\text{g/ml}) = 0.0362$ , \*\* $P(20 \mu\text{g/ml}) = 0.0017$ , and \*\* $P(40 \mu\text{g/ml}) = 0.0019$ ; two-tailed unpaired Student's  $t$ -test; GAPDH was used as a loading control for cell lysis).
- E Protein contents in sEVs from control (Con) and LSD1 knockout (KO) cells were profiled using mass spectrometry ( $n = 3$  biological replicates; mean  $\pm$  SEM).

Source data are available online for this figure.

**Figure EV2. LSD1 expression is correlated with gastric cancer cell stemness.**

- A Expression level of LSD1 in MGC-803, *LSD1* knockout (KO) MGC-803, *LSD1* KO MGC-803 cells transfected with LSD1-encoding plasmid, and GSK-LSD1-treated MGC-803 cells. GAPDH was used as a loading control.
- B Sphere formation assay results of MGC-803 cells subjected to different treatments as indicated in the figure. Scale bar = 100  $\mu\text{m}$  ( $n = 3$  biological replicates; mean  $\pm$  standard error mean (SEM); \*\* $P = 0.0042$  and \* $P = 0.0146$ ; two-tailed unpaired Student's  $t$ -test).
- C Correlation of LSD1 (KDM1A) with Nanog, OCT4, and CD44 determined using Gene Expression Profiling Interactive Analysis (GEPIA) datasets (Pearson's test).
- D, E Expression levels of LSD1 (D) and SOX2 (E) in 172 pairs of gastric cancer tissues and adjacent non-cancerous tissues were examined using immunohistochemical analysis ( $n = 172$  paired tissues; mean  $\pm$  SEM; \*\*\* $P < 0.0001$  (LSD1) and \* $P = 0.0348$  (SOX2); two-tailed unpaired Student's  $t$ -test).
- F Representative images are shown as indicated. Scale bar = 100  $\mu\text{m}$ .

Source data are available online for this figure.

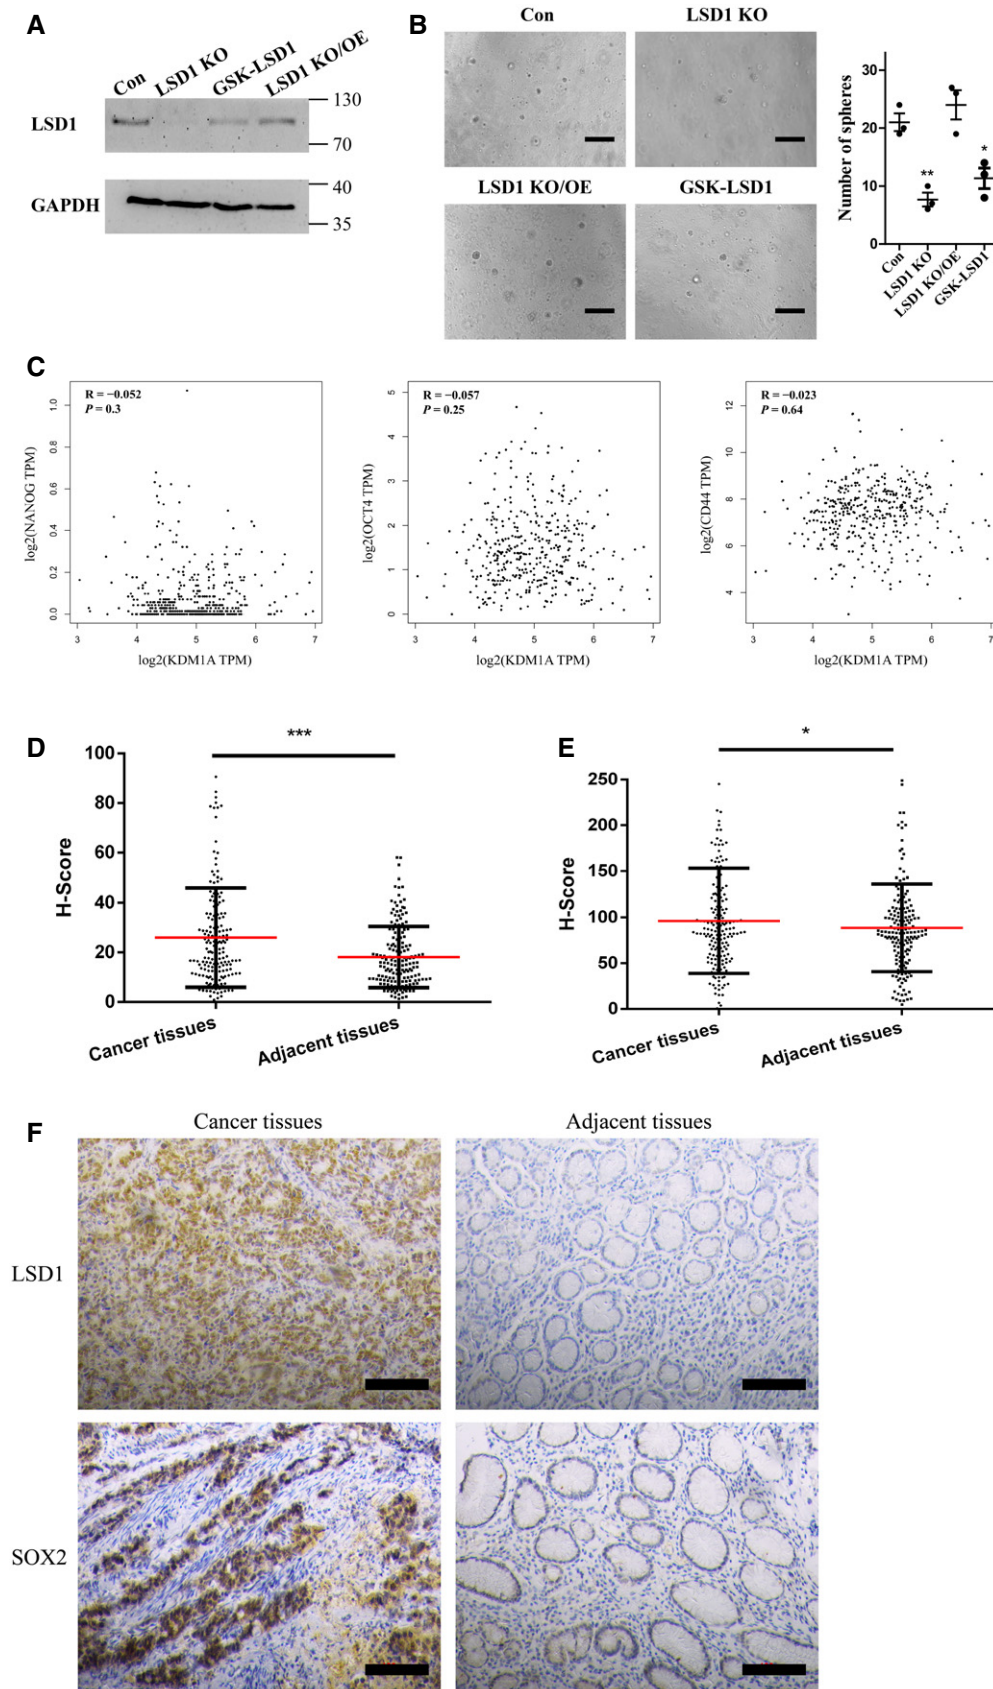

Figure EV2.

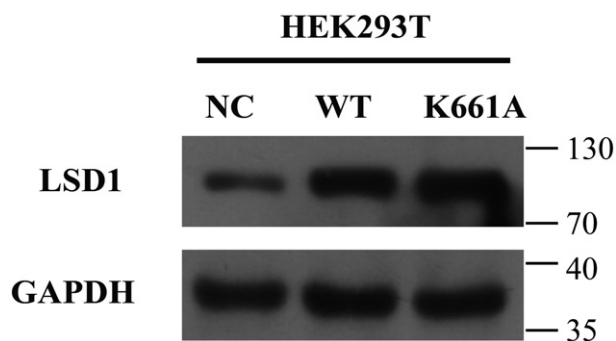

**Figure EV3. Detection of LSD1 in HEK293T cells transfected with different vectors.**

Expression levels of LSD1 in HEK293T cells transfected with the negative control, LSD1-encoding, or LSD1 K661A mutant-encoding plasmids.

Source data are available online for this figure.

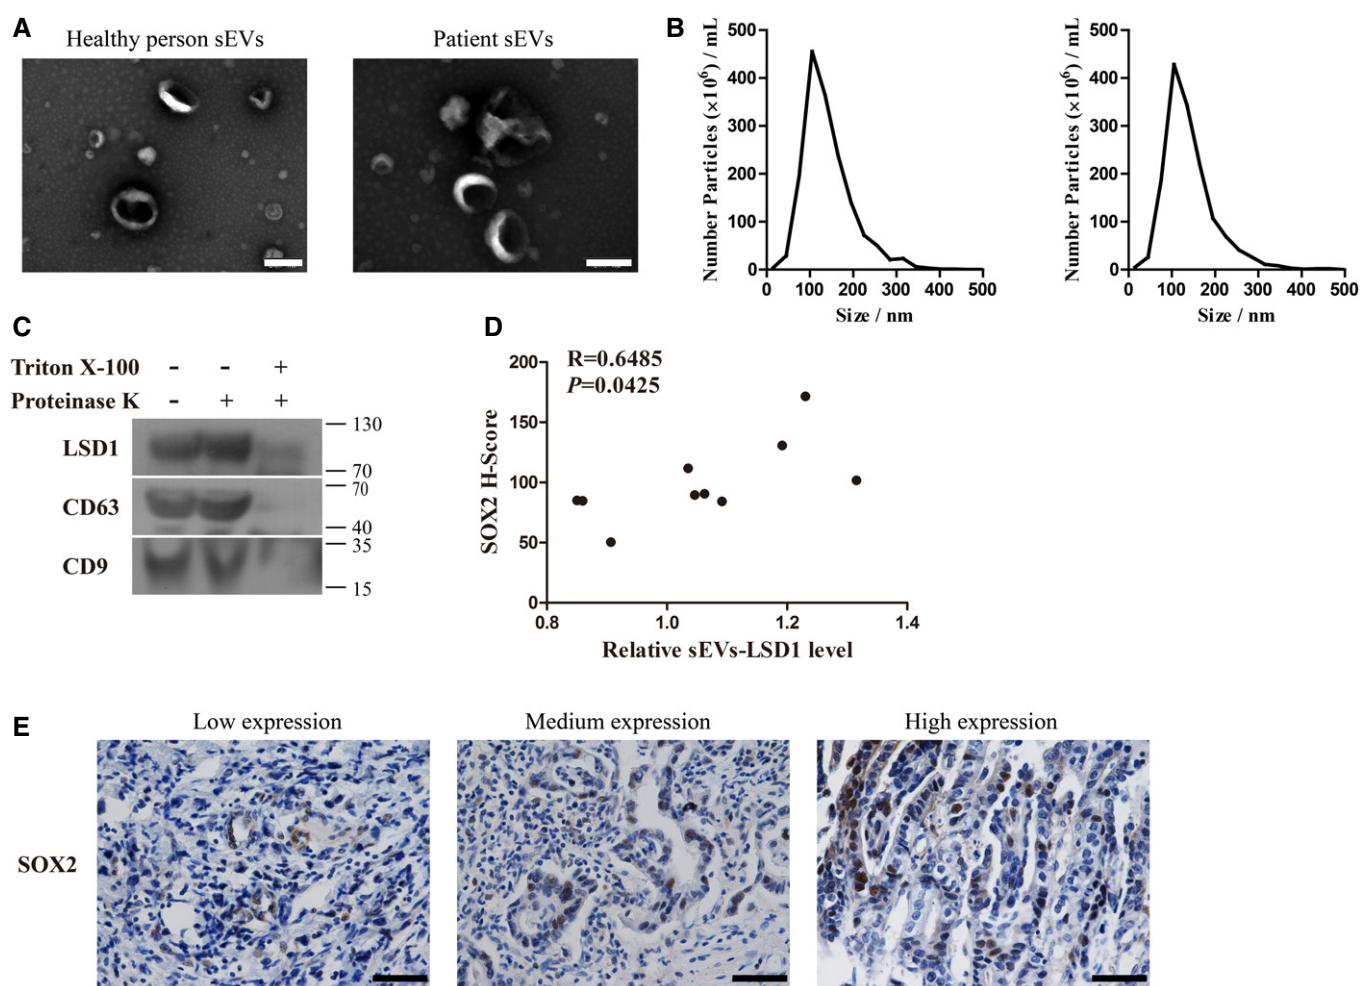

**Figure EV4. Characterization of patient plasma-derived small extracellular vesicles (sEVs).**

A, B Transmission electron microscopy image (A) and the size distribution (B) of sEVs from the plasma of healthy individuals (left panel) and patients with gastric cancer (right panel). Scale bar = 200 nm.

C Expression levels of LSD1, CD63, and CD9 in sEVs with indicated treatment.

D Correlation between the amount of LSD1-containing sEVs and SOX2 in tissues of 10 patients used to isolate sEVs (Pearson's test).

E Representative images are shown as indicated. Scale bar = 50  $\mu$ m.

Source data are available online for this figure.
