# Supplementary material
Source: PubMed Central journal article supplement (PMC8339672)

**Figure 4**

**C**

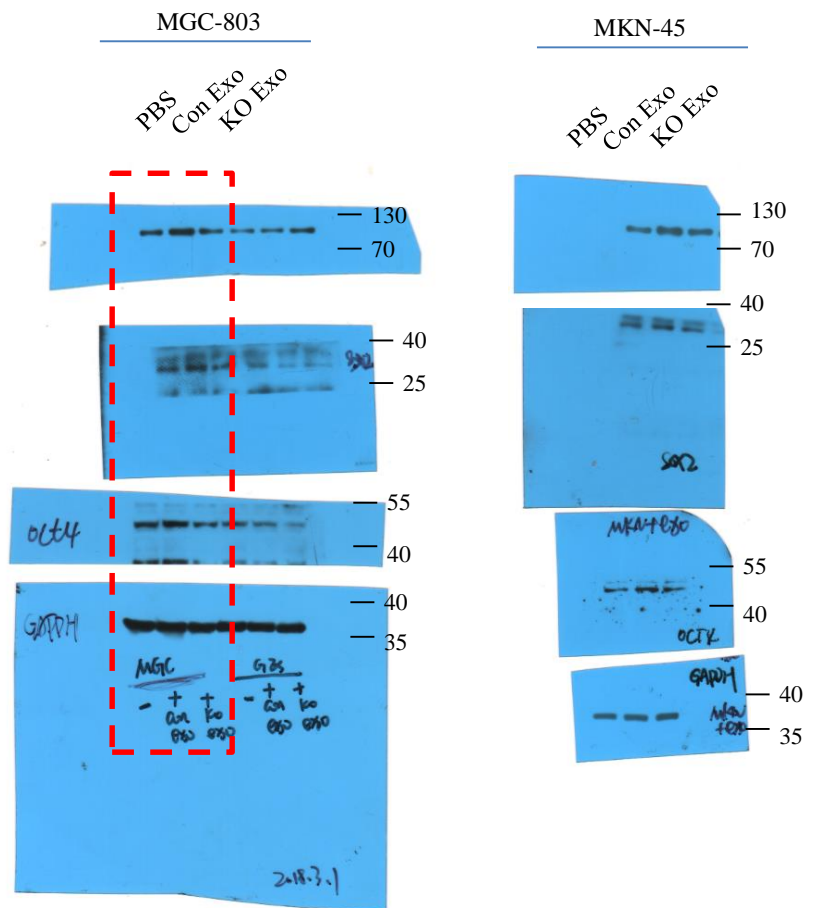

Supplement: EMBR-22-e50922-s001.pdf [file EMBR-22-e50922-s001.pdf]

**Figure 3**

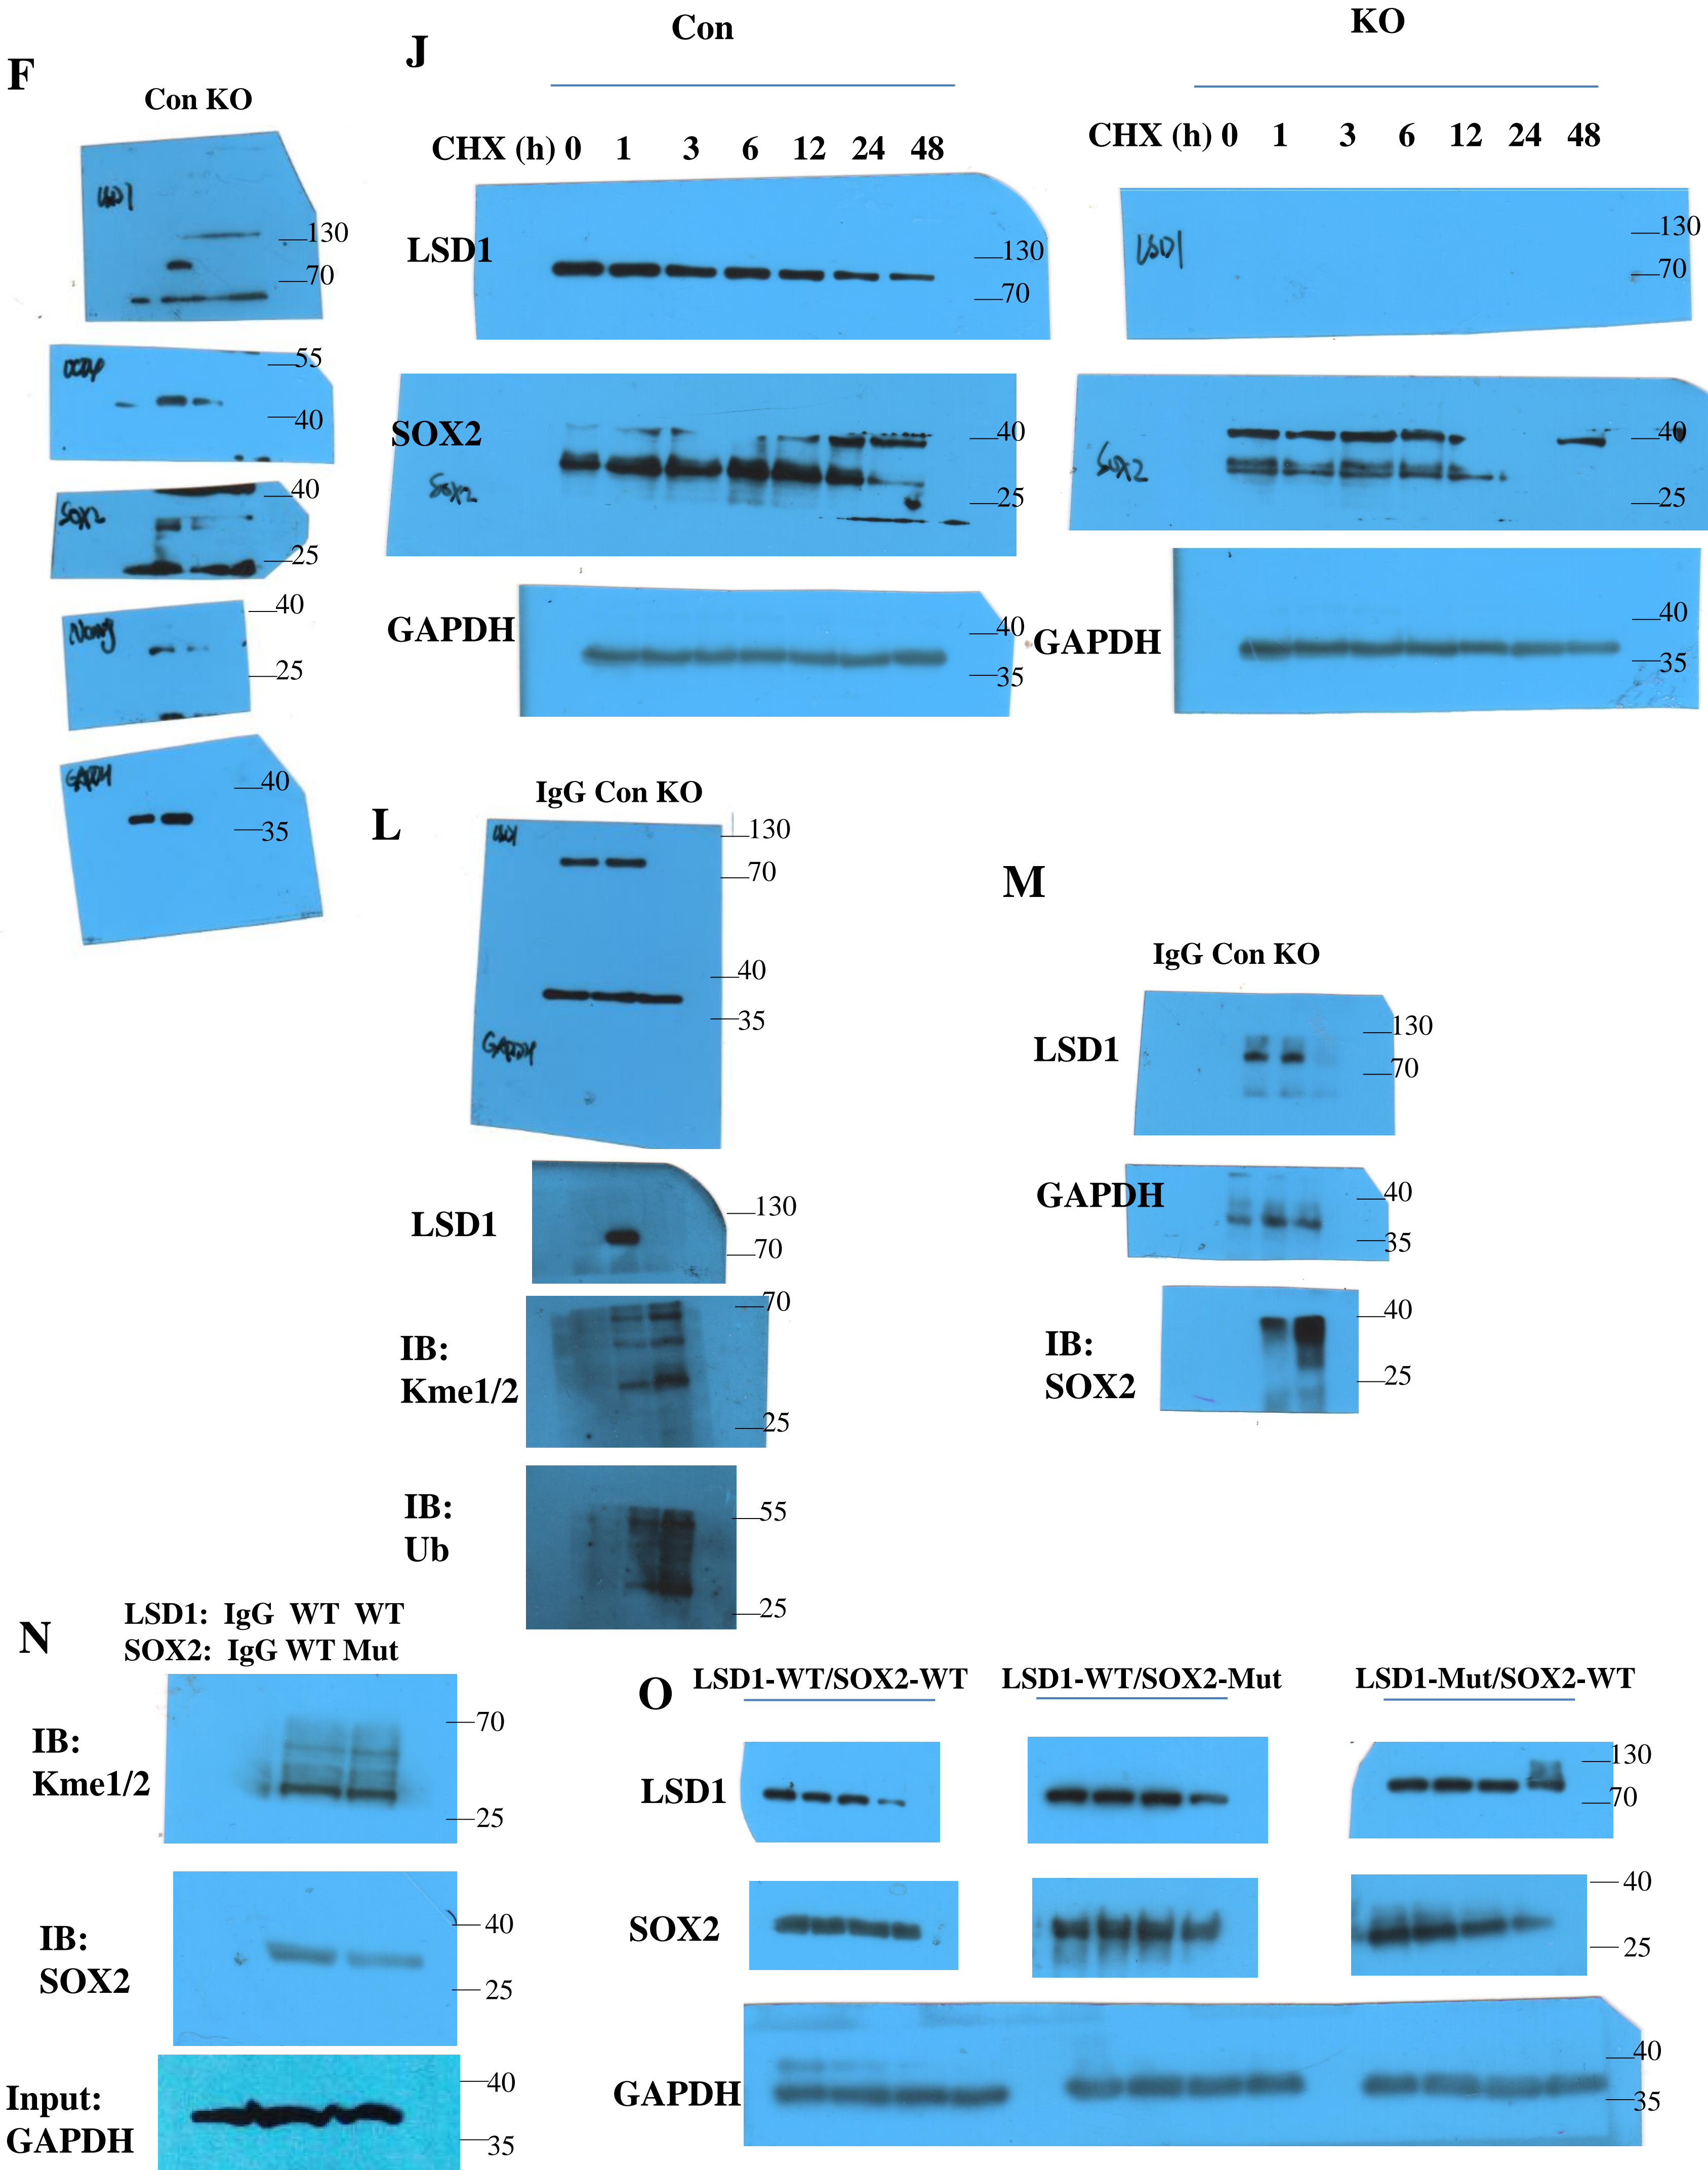

Supplement: EMBR-22-e50922-s003.pdf [file EMBR-22-e50922-s003.pdf]

**Figure 1**

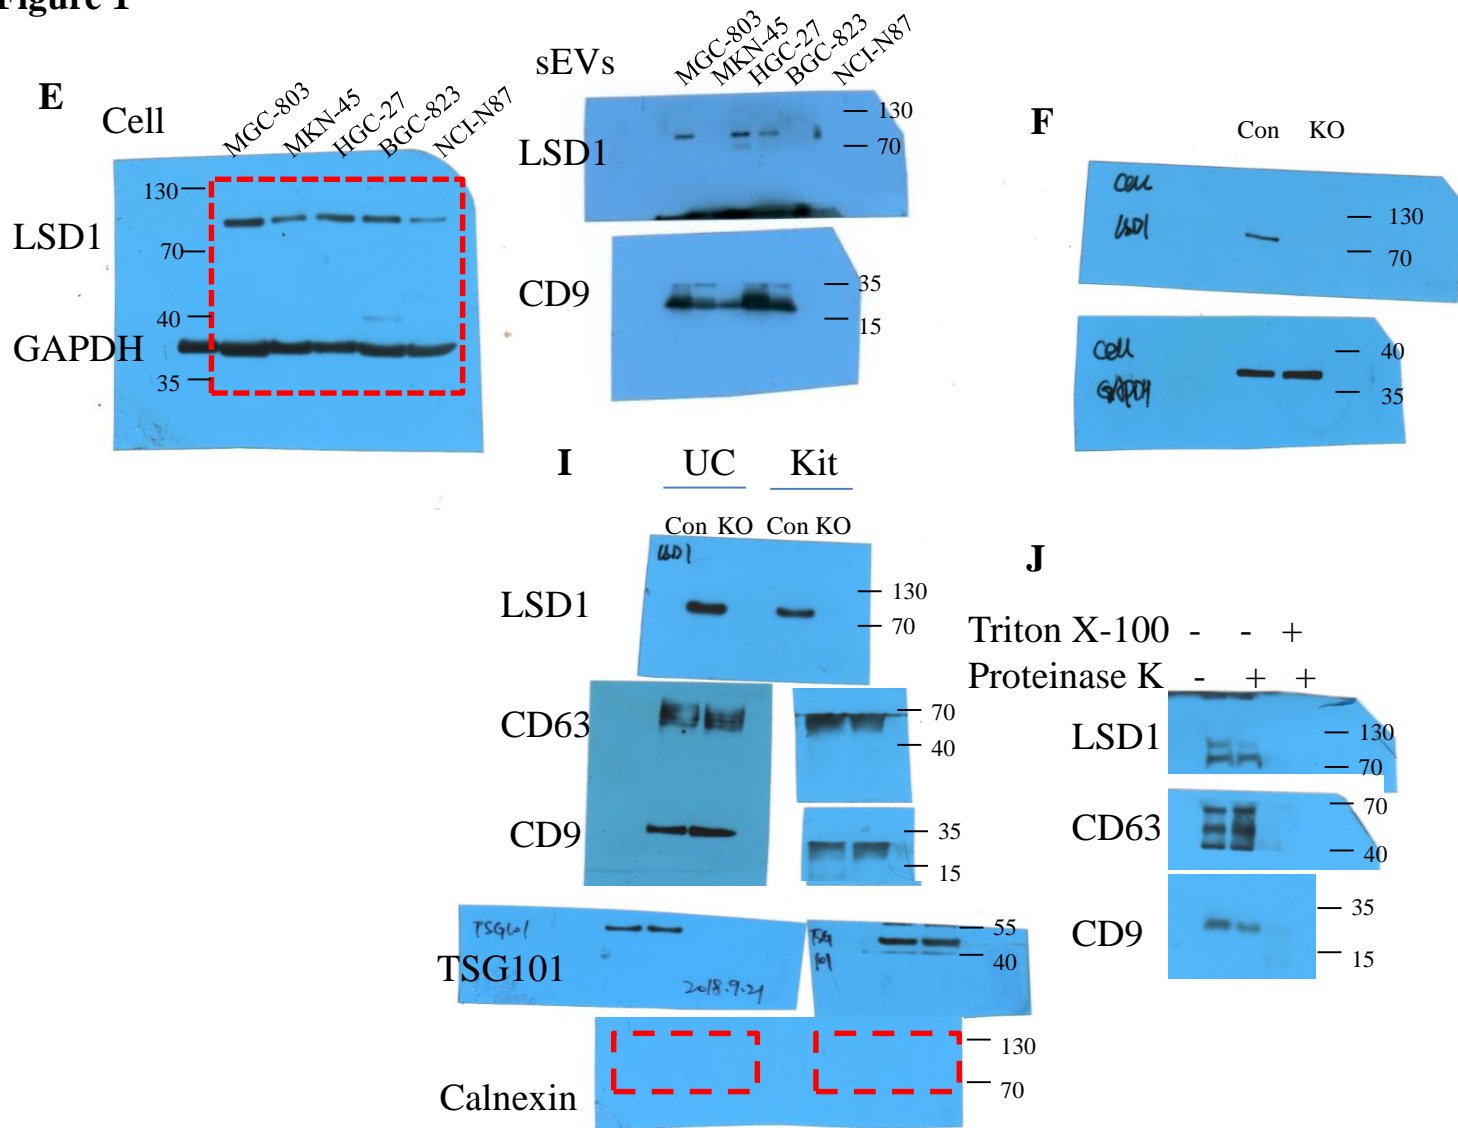

Calnexin was a sEVs negative marker, which shouldn't be detected in sEVs.

**G**

Con sEVs

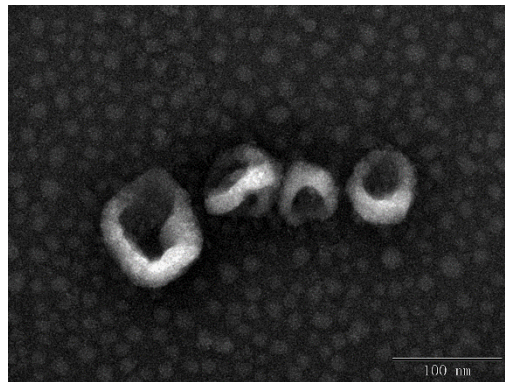

KO sEVs

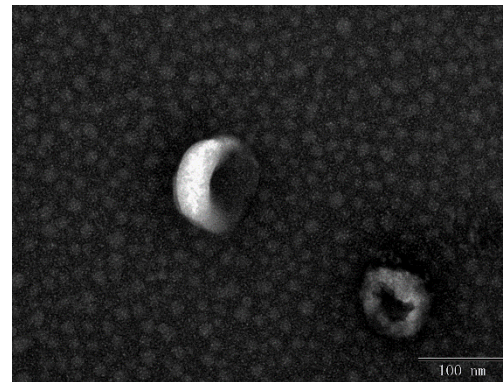

Supplement: EMBR-22-e50922-s006.pdf [file EMBR-22-e50922-s006.pdf]

Figure 5

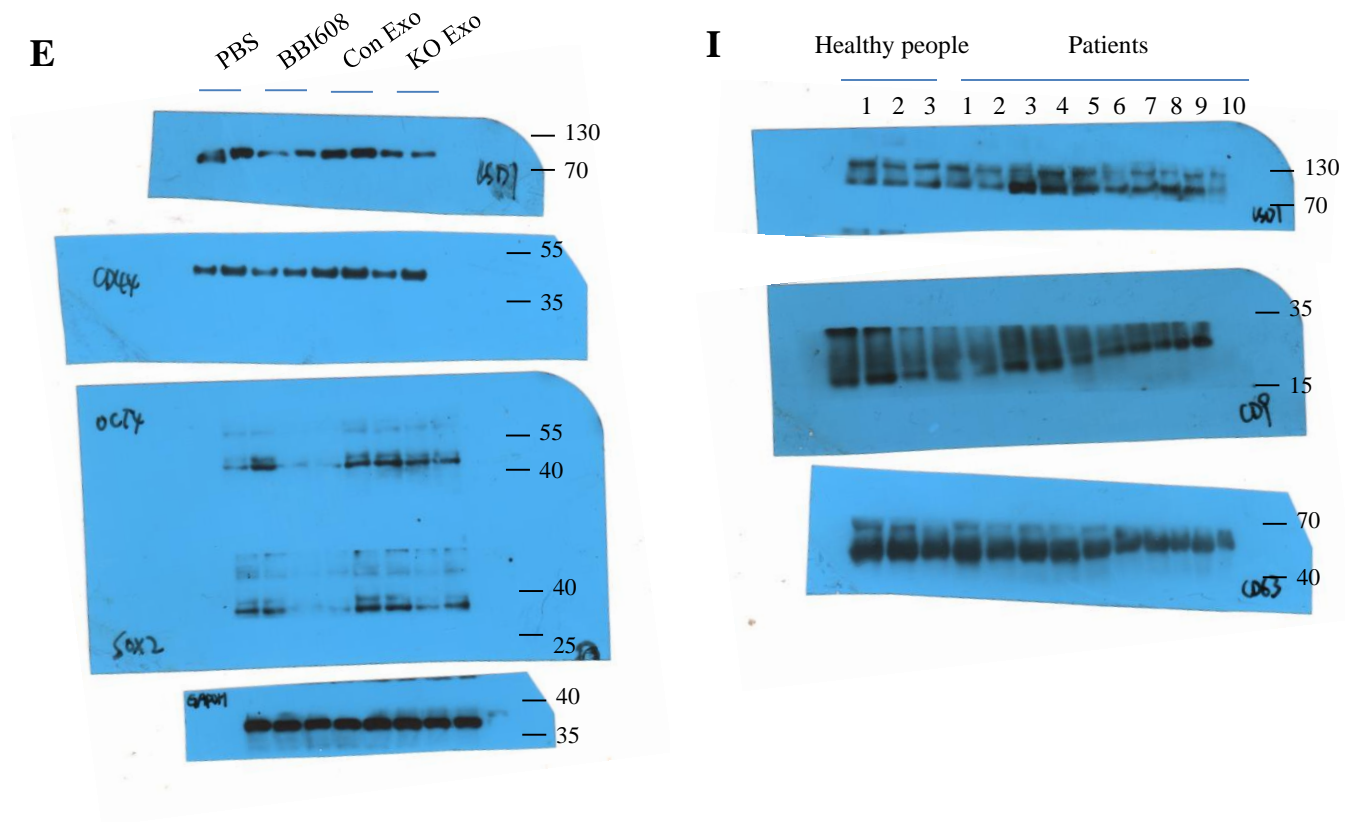

Supplement: EMBR-22-e50922-s007.pdf [file EMBR-22-e50922-s007.pdf]
